# Supplementary material
Source: MDPI journal article supplement (https://www.mdpi.com/2624-7402/5/2/44)
Supplement: s1 [file s1]

## Supplementary Information

Image from Sentinel-2 to locations A through F with their respective five plots (indicated by the shapes), totaling 30 plots, and their respective areas (ha) that were used in the stage of model validation for yield prediction.

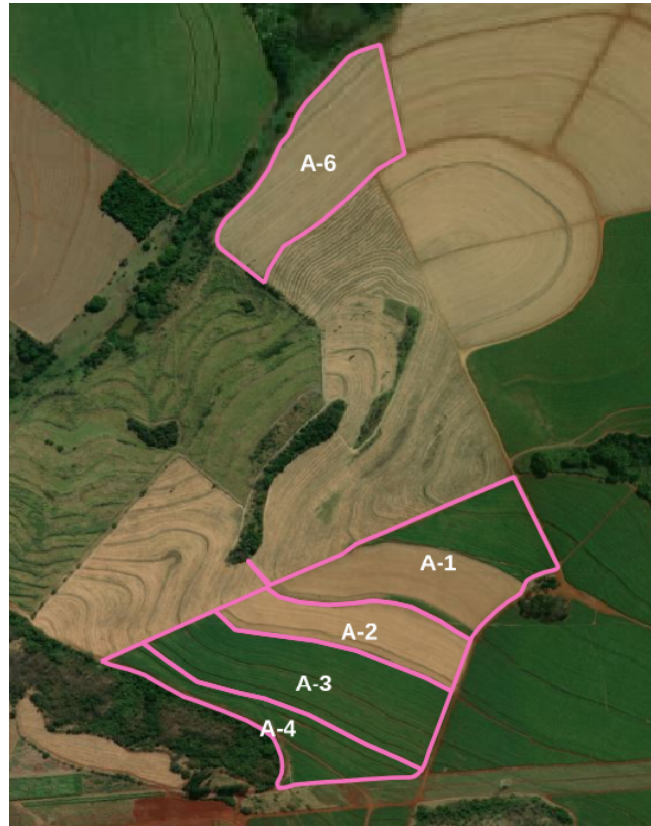

**Figure S1.** Location A in the Farm Aurora with five productions plots indicated as A-1 (8.71 ha), A-2 (4.46 ha), A-3 (8.03 ha), A-4 (4.04 ha), and A-6 (7.22 ha) during the harvest in 2022. São Paulo, Brazil.

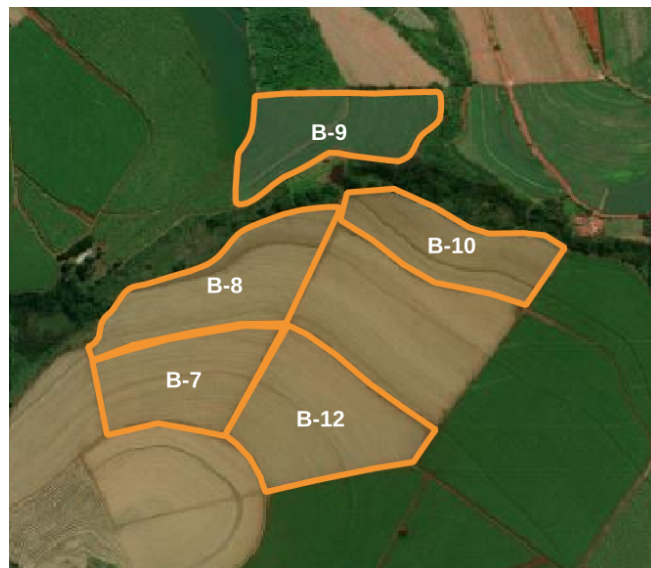

**Figure S2.** Location B in the Farm Aurora with five productions plots indicated as B-7 (8.58 ha), B-8 (9.88 ha), B-9 (7.62 ha), B-10 (7.02 ha), and B-12 (11.07 ha) during the harvest in 2022. São Paulo, Brazil.

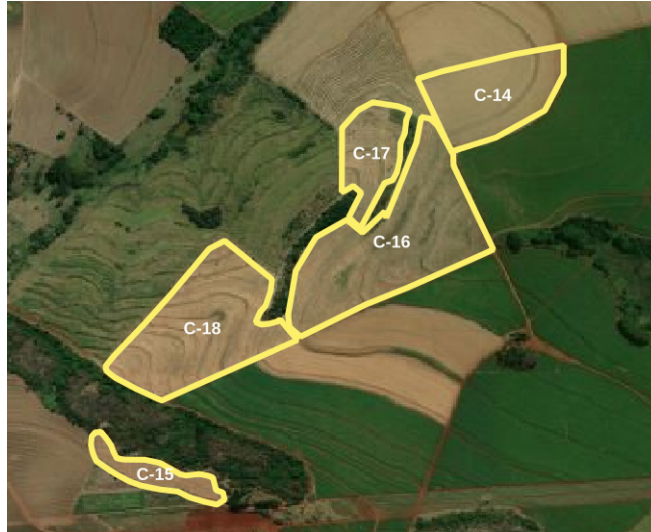

**Figure S3.** Location C in the Farm Aurora with five productions plots indicated as C-14 (5.75 ha), C-15 (1.27 ha), C-16 (11.68 ha), C-17 (2.48 ha), and C-18 (9.37 ha) during the harvest in 2022. São Paulo, Brazil.

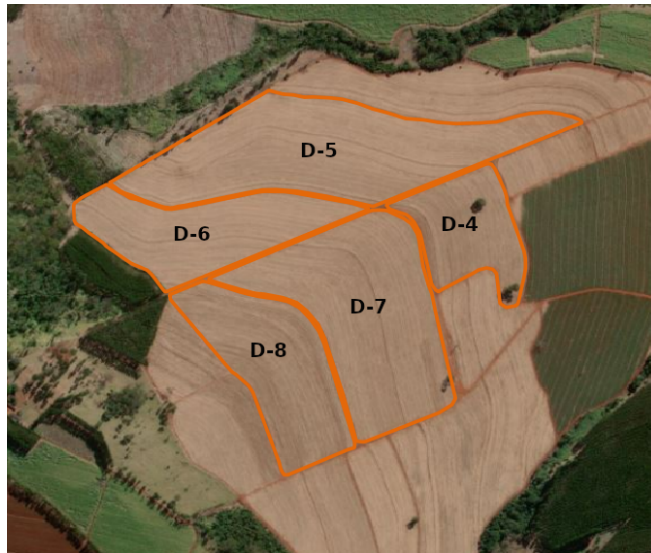

**Figure S4.** Location D in the Farm Boa Vista 6 with five productions plots indicated as D-4 (4.45 ha), D-5 (12.32 ha), D-6 (6.36 ha), D-7 (11.47 ha), and D-8 (7 ha) during the harvest in 2022. São Paulo, Brazil.

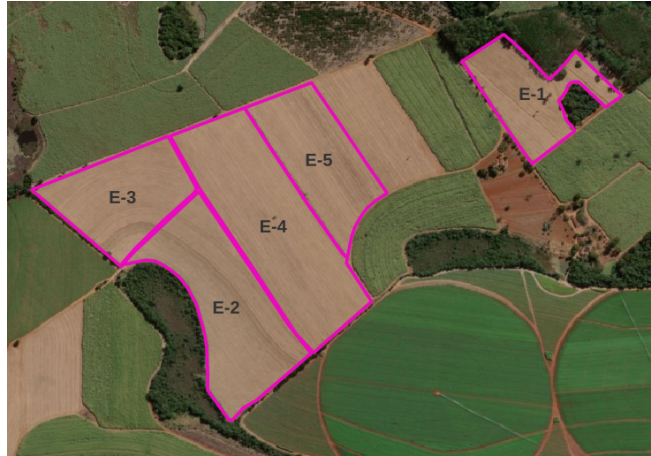

**Figure S5.** Location E in the Farm São Vicente with five productions plots indicated as E-1 (7.15 ha), E-2 (12.66 ha), E-3 (8.64 ha), E-4 (17.1 ha), and E-5 (8.78 ha) during the harvest in 2022. São Paulo, Brazil.

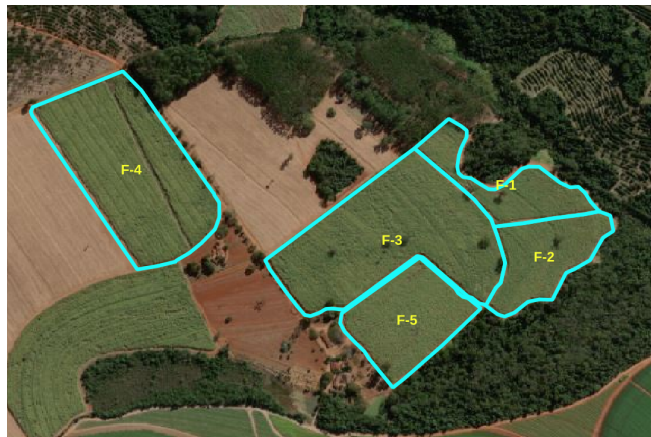

**Figure S6.** Location F in the Farm São Vicente 1 with five productions plots indicated as F-1 (2.81 ha), F-2 (2.65 ha), F-3 (8.1 ha), F-4 (8.29 ha), and F-5 (3.69 ha) during the harvest in 2022. São Paulo, Brazil.

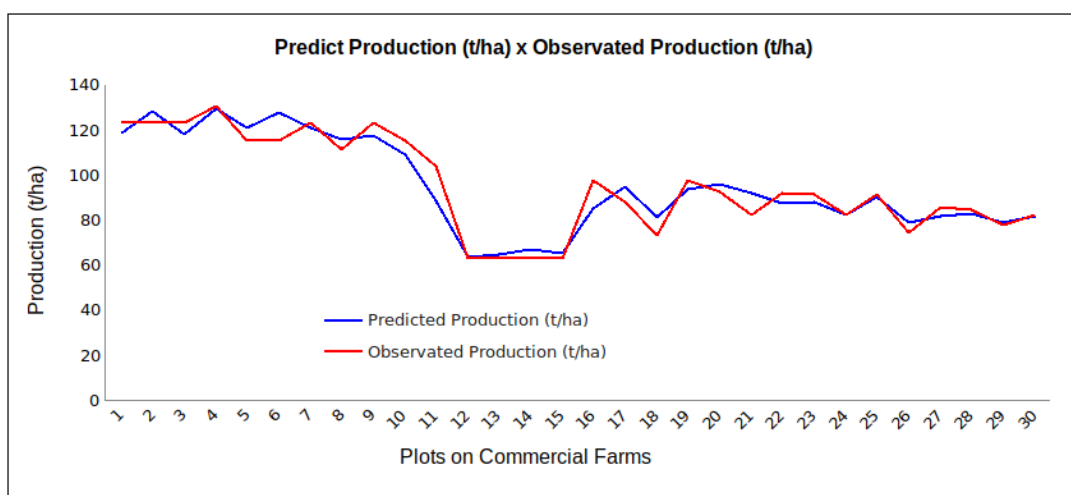

**Figure S7.** Graphic of data comparison between Predicted Production (blue line) and Observed Production (red line) for all plots tested during the model validation.

Table S1 – Data of observed production, NDVI, and VARI of two experimental fields ( Field A and Field B) applied in the development of the sugarcane prediction model.

| Experimental plot number | Sugarcane Variety | Block | Experimental Field | Production (t/ha) | NDVI | VARI |
|--------------------------|-------------------|-------|--------------------|-------------------|------|------|
| 1                        | CV_0618           | B1    | B                  | 105.56            | 0.82 | 0.44 |
| 2                        | CV_7870           | B1    | B                  | 107.41            | 0.83 | 0.49 |
| 3                        | CV_0618           | B1    | B                  | 124.07            | 0.83 | 0.42 |
| 4                        | CV_0618           | B1    | B                  | 103.7             | 0.82 | 0.42 |
| 5                        | CV_7870           | B1    | B                  | 166.67            | 0.82 | 0.42 |
| 6                        | CV_7870           | B1    | B                  | 137.04            | 0.84 | 0.4  |
| 7                        | RB_966928         | B1    | B                  | 112.96            | 0.84 | 0.4  |
| 8                        | CTC_1007          | B1    | B                  | 109.26            | 0.84 | 0.4  |
| 9                        | RB_966928         | B1    | B                  | 131.48            | 0.86 | 0.31 |
| 10                       | CTC_1007          | B1    | B                  | 129.63            | 0.86 | 0.37 |
| 11                       | RB_966928         | B1    | B                  | 131.48            | 0.82 | 0.3  |
| 12                       | CV_0618           | B1    | B                  | 116.67            | 0.82 | 0.38 |
| 13                       | RB_966928         | B1    | B                  | 144.44            | 0.83 | 0.31 |
| 14                       | CV_7870           | B1    | B                  | 125.93            | 0.84 | 0.31 |
| 15                       | CV_0618           | B1    | B                  | 103.7             | 0.84 | 0.34 |
| 16                       | RB_966928         | B1    | B                  | 127.78            | 0.83 | 0.33 |
| 17                       | CV_7870           | B1    | B                  | 103.7             | 0.77 | 0.33 |
| 18                       | CTC_1007          | B1    | B                  | 109.26            | 0.83 | 0.42 |
| 19                       | CV_0618           | B1    | B                  | 96.3              | 0.84 | 0.26 |
| 20                       | CV_0618           | B1    | B                  | 94.44             | 0.83 | 0.31 |
| 21                       | CV_7870           | B1    | B                  | 164.81            | 0.84 | 0.45 |
| 22                       | RB_966928         | B1    | B                  | 142.59            | 0.83 | 0.49 |
| 23                       | CTC_1007          | B1    | B                  | 153.7             | 0.83 | 0.47 |
| 24                       | CV_7870           | B1    | B                  | 174.07            | 0.84 | 0.44 |
| 25                       | CTC_1007          | B1    | B                  | 187.04            | 0.84 | 0.41 |

| Experimental plot number | Sugarcane Variety | Block | Experimental Field | Production (t/ha) | NDVI | VARI |
|--------------------------|-------------------|-------|--------------------|-------------------|------|------|
| 26                       | CTC_1007          | B1    | B                  | 164.81            | 0.83 | 0.42 |
| 27                       | RB_966928         | B1    | B                  | 124.07            | 0.85 | 0.36 |
| 28                       | CTC_1007          | B1    | B                  | 120.37            | 0.84 | 0.37 |
| 29                       | RB_966928         | B2    | B                  | 120.37            | 0.85 | 0.29 |
| 30                       | CV_7870           | B2    | B                  | 118.52            | 0.88 | 0.29 |
| 31                       | CV_0618           | B2    | B                  | 124.07            | 0.88 | 0.31 |
| 32                       | RB_966928         | B2    | B                  | 118.52            | 0.83 | 0.31 |
| 33                       | CTC_1007          | B2    | B                  | 168.52            | 0.82 | 0.35 |
| 34                       | CV_7870           | B2    | B                  | 101.85            | 0.83 | 0.3  |
| 35                       | RB_966928         | B2    | B                  | 116.67            | 0.83 | 0.26 |
| 36                       | CV_7870           | B2    | B                  | 114.81            | 0.84 | 0.24 |
| 37                       | CV_7870           | B2    | B                  | 114.81            | 0.83 | 0.25 |
| 38                       | CTC_1007          | B2    | B                  | 122.22            | 0.82 | 0.35 |
| 39                       | CV_7870           | B2    | B                  | 83.33             | 0.79 | 0.24 |
| 40                       | CV_0618           | B2    | B                  | 81.48             | 0.72 | 0.25 |
| 41                       | RB_966928         | B2    | B                  | 155.56            | 0.84 | 0.4  |
| 42                       | CV_7870           | B2    | B                  | 177.78            | 0.85 | 0.48 |
| 43                       | CTC_1007          | B2    | B                  | 142.59            | 0.84 | 0.46 |
| 44                       | RB_966928         | B2    | B                  | 183.33            | 0.84 | 0.49 |
| 45                       | CV_0618           | B2    | B                  | 164.81            | 0.85 | 0.44 |
| 46                       | RB_966928         | B2    | B                  | 157.41            | 0.85 | 0.32 |
| 47                       | CV_0618           | B2    | B                  | 159.26            | 0.84 | 0.21 |
| 48                       | CV_0618           | B2    | B                  | 112.96            | 0.83 | 0.24 |
| 49                       | CTC_1007          | B2    | B                  | 124.07            | 0.84 | 0.31 |
| 50                       | RB_966928         | B2    | B                  | 111.11            | 0.84 | 0.25 |

| Experimental plot number | Sugarcane Variety | Block | Experimental Field | Production (t/ha) | NDVI | VARI |
|--------------------------|-------------------|-------|--------------------|-------------------|------|------|
| 51                       | CV_0618           | B2    | B                  | 98.15             | 0.84 | 0.24 |
| 52                       | CTC_1007          | B2    | B                  | 137.04            | 0.83 | 0.35 |
| 53                       | CTC_1007          | B2    | B                  | 140.74            | 0.83 | 0.33 |
| 54                       | CV_7870           | B2    | B                  | 105.56            | 0.83 | 0.25 |
| 55                       | CTC_1007          | B2    | B                  | 133.33            | 0.83 | 0.36 |
| 56                       | CV_0618           | B2    | B                  | 111.11            | 0.84 | 0.3  |
| 57                       | CV_7870           | B3    | B                  | 135.19            | 0.84 | 0.34 |
| 58                       | CV_7870           | B3    | B                  | 118.52            | 0.84 | 0.32 |
| 59                       | CV_0618           | B3    | B                  | 92.59             | 0.84 | 0.29 |
| 60                       | RB_966928         | B3    | B                  | 107.41            | 0.82 | 0.35 |
| 61                       | CV_7870           | B3    | B                  | 155.56            | 0.85 | 0.44 |
| 62                       | RB_966928         | B3    | B                  | 146.3             | 0.85 | 0.49 |
| 63                       | CTC_1007          | B3    | B                  | 149.91            | 0.85 | 0.42 |
| 64                       | CTC_1007          | B3    | B                  | 151.85            | 0.84 | 0.4  |
| 65                       | RB_966928         | B3    | B                  | 155.56            | 0.85 | 0.38 |
| 66                       | CTC_1007          | B3    | B                  | 150               | 0.84 | 0.42 |
| 67                       | RB_966928         | B3    | B                  | 177.78            | 0.85 | 0.39 |
| 68                       | CV_7870           | B3    | B                  | 175               | 0.85 | 0.26 |
| 69                       | CTC_1007          | B3    | B                  | 150               | 0.84 | 0.35 |
| 70                       | CV_0618           | B3    | B                  | 122.22            | 0.84 | 0.26 |
| 71                       | RB_966928         | B3    | B                  | 105.56            | 0.88 | 0.28 |
| 72                       | CV_7870           | B3    | B                  | 94.44             | 0.86 | 0.23 |
| 73                       | CV_0618           | B3    | B                  | 94.44             | 0.78 | 0.16 |
| 74                       | CV_7870           | B3    | B                  | 109.26            | 0.83 | 0.32 |
| 75                       | CV_0618           | B3    | B                  | 114.81            | 0.85 | 0.31 |

| Experimental plot number | Sugarcane Variety | Block | Experimental Field | Production (t/ha) | NDVI | VARI |
|--------------------------|-------------------|-------|--------------------|-------------------|------|------|
| 76                       | CTC_1007          | B3    | B                  | 116.67            | 0.82 | 0.29 |
| 77                       | RB_966928         | B3    | B                  | 118.52            | 0.82 | 0.25 |
| 78                       | CV_0618           | B3    | B                  | 87.04             | 0.83 | 0.28 |
| 79                       | CV_0618           | B3    | B                  | 98.15             | 0.84 | 0.28 |
| 80                       | CTC_1007          | B3    | B                  | 112.96            | 0.81 | 0.36 |
| 81                       | CV_0618           | B3    | B                  | 165.37            | 0.84 | 0.36 |
| 82                       | RB_966928         | B3    | B                  | 140.74            | 0.85 | 0.35 |
| 83                       | RB_966928         | B3    | B                  | 168.52            | 0.85 | 0.32 |
| 84                       | CTC_1007          | B3    | B                  | 140.74            | 0.84 | 0.32 |
| 85                       | CV_0618           | B4    | B                  | 150               | 0.85 | 0.28 |
| 86                       | CTC_1007          | B4    | B                  | 179.63            | 0.84 | 0.33 |
| 87                       | RB_966928         | B4    | B                  | 111.11            | 0.83 | 0.34 |
| 88                       | CV_7870           | B4    | B                  | 107.41            | 0.83 | 0.23 |
| 89                       | CV_0618           | B4    | B                  | 112.96            | 0.84 | 0.23 |
| 90                       | CV_7870           | B4    | B                  | 111.11            | 0.85 | 0.28 |
| 91                       | CTC_1007          | B4    | B                  | 114.81            | 0.84 | 0.33 |
| 92                       | CTC_1007          | B4    | B                  | 131.48            | 0.83 | 0.38 |
| 93                       | RB_966928         | B4    | B                  | 103.7             | 0.83 | 0.36 |
| 94                       | CV_7870           | B4    | B                  | 120.37            | 0.85 | 0.4  |
| 95                       | RB_966928         | B4    | B                  | 107.41            | 0.83 | 0.28 |
| 96                       | CV_7870           | B4    | B                  | 111.11            | 0.86 | 0.31 |
| 97                       | RB_966928         | B4    | B                  | 101.85            | 0.83 | 0.31 |
| 98                       | RB_966928         | B4    | B                  | 151.85            | 0.84 | 0.27 |
| 99                       | RB_966928         | B4    | B                  | 157.41            | 0.85 | 0.29 |
| 100                      | CTC_1007          | B4    | B                  | 140.74            | 0.84 | 0.26 |



| Experimental plot number | Sugarcane Variety | Block | Experimental Field | Production (t/ha) | NDVI | VARI |
|--------------------------|-------------------|-------|--------------------|-------------------|------|------|
| 101                      | CV_0618           | B4    | B                  | 166.67            | 0.85 | 0.24 |
| 102                      | CV_0618           | B4    | B                  | 137.04            | 0.83 | 0.2  |
| 103                      | CV_0618           | B4    | B                  | 131.48            | 0.83 | 0.22 |
| 104                      | CV_7870           | B4    | B                  | 137.04            | 0.82 | 0.18 |
| 105                      | RB_966928         | B4    | B                  | 107.41            | 0.82 | 0.17 |
| 106                      | CV_0618           | B4    | B                  | 100               | 0.81 | 0.1  |
| 107                      | CTC_1007          | B4    | B                  | 116.67            | 0.82 | 0.26 |
| 108                      | CTC_1007          | B4    | B                  | 125.93            | 0.82 | 0.36 |
| 109                      | CV_7870           | B4    | B                  | 120.37            | 0.8  | 0.29 |
| 110                      | CV_7870           | B4    | B                  | 116.67            | 0.8  | 0.29 |
| 111                      | CTC_1007          | B4    | B                  | 116.67            | 0.83 | 0.35 |
| 112                      | CV_0618           | B4    | B                  | 77.78             | 0.77 | 0.26 |
| 113                      | CV_0618           | B1    | A                  | 120.48            | 0.8  | 0.64 |
| 114                      | CV_7870           | B1    | A                  | 102.67            | 0.79 | 0.53 |
| 115                      | CV_0618           | B1    | A                  | 75.64             | 0.76 | 0.44 |
| 116                      | CV_0618           | B1    | A                  | 82.13             | 0.77 | 0.34 |
| 117                      | CV_7870           | B1    | A                  | 79.2              | 0.76 | 0.39 |
| 118                      | CV_7870           | B1    | A                  | 83.6              | 0.78 | 0.37 |
| 119                      | RB_966928         | B1    | A                  | 85.28             | 0.79 | 0.41 |
| 120                      | CTC_1007          | B1    | A                  | 111.68            | 0.8  | 0.68 |
| 121                      | RB_966928         | B1    | A                  | 96.17             | 0.79 | 0.46 |
| 122                      | CTC_1007          | B1    | A                  | 80.04             | 0.77 | 0.46 |
| 123                      | RB_966928         | B1    | A                  | 74.38             | 0.78 | 0.36 |
| 124                      | CV_0618           | B1    | A                  | 83.81             | 0.77 | 0.37 |
| 125                      | RB_966928         | B1    | A                  | 77.52             | 0.76 | 0.3  |

| Experimental plot number | Sugarcane Variety | Block | Experimental Field | Production (t/ha) | NDVI | VARI |
|--------------------------|-------------------|-------|--------------------|-------------------|------|------|
| 126                      | CV_7870           | B1    | A                  | 74.38             | 0.79 | 0.39 |
| 127                      | CV_0618           | B1    | A                  | 139.33            | 0.8  | 0.55 |
| 128                      | RB_966928         | B1    | A                  | 82.34             | 0.78 | 0.28 |
| 129                      | CV_7870           | B1    | A                  | 59.71             | 0.76 | 0.21 |
| 130                      | CTC_1007          | B1    | A                  | 89.68             | 0.79 | 0.58 |
| 131                      | CV_0618           | B1    | A                  | 93.03             | 0.78 | 0.53 |
| 132                      | CV_0618           | B1    | A                  | 79.83             | 0.78 | 0.44 |
| 133                      | CV_7870           | B1    | A                  | 77.73             | 0.79 | 0.39 |
| 134                      | RB_966928         | B1    | A                  | 117.96            | 0.81 | 0.41 |
| 135                      | CTC_1007          | B1    | A                  | 103.71            | 0.78 | 0.43 |
| 136                      | CV_7870           | B1    | A                  | 87.37             | 0.77 | 0.29 |
| 137                      | CTC_1007          | B1    | A                  | 88.42             | 0.79 | 0.29 |
| 138                      | CTC_1007          | B1    | A                  | 96.17             | 0.8  | 0.42 |
| 139                      | RB_966928         | B1    | A                  | 86.95             | 0.78 | 0.34 |
| 140                      | CTC_1007          | B1    | A                  | 105.81            | 0.8  | 0.37 |
| 141                      | RB_966928         | B2    | A                  | 125.3             | 0.8  | 0.45 |
| 142                      | CV_7870           | B2    | A                  | 68.72             | 0.77 | 0.26 |
| 143                      | CV_0618           | B2    | A                  | 92.82             | 0.76 | 0.38 |
| 144                      | RB_966928         | B2    | A                  | 80.67             | 0.75 | 0.34 |
| 145                      | CTC_1007          | B2    | A                  | 87.37             | 0.78 | 0.6  |
| 146                      | CV_7870           | B2    | A                  | 76.69             | 0.78 | 0.42 |
| 147                      | RB_966928         | B2    | A                  | 77.1              | 0.77 | 0.39 |
| 148                      | CV_7870           | B2    | A                  | 73.96             | 0.79 | 0.51 |
| 149                      | CV_7870           | B2    | A                  | 70.19             | 0.77 | 0.32 |
| 150                      | CTC_1007          | B2    | A                  | 84.44             | 0.78 | 0.54 |

| Experimental plot number | Sugarcane Variety | Block | Experimental Field | Production (t/ha) | NDVI | VARI |
|--------------------------|-------------------|-------|--------------------|-------------------|------|------|
| 151                      | CV_7870           | B2    | A                  | 92.4              | 0.79 | 0.53 |
| 152                      | CV_0618           | B2    | A                  | 93.24             | 0.78 | 0.44 |
| 153                      | RB_966928         | B2    | A                  | 84.02             | 0.78 | 0.46 |
| 154                      | CV_7870           | B2    | A                  | 72.08             | 0.77 | 0.31 |
| 155                      | CTC_1007          | B2    | A                  | 124.04            | 0.79 | 0.61 |
| 156                      | RB_966928         | B2    | A                  | 80.67             | 0.77 | 0.32 |
| 157                      | CV_0618           | B2    | A                  | 96.17             | 0.79 | 0.55 |
| 158                      | RB_966928         | B2    | A                  | 97.43             | 0.78 | 0.42 |
| 159                      | CV_0618           | B2    | A                  | 82.13             | 0.8  | 0.3  |
| 160                      | CV_0618           | B2    | A                  | 79.62             | 0.79 | 0.43 |
| 161                      | CTC_1007          | B2    | A                  | 83.39             | 0.79 | 0.44 |
| 162                      | RB_966928         | B2    | A                  | 103.71            | 0.79 | 0.44 |
| 163                      | CV_0618           | B2    | A                  | 82.76             | 0.78 | 0.33 |
| 164                      | CTC_1007          | B2    | A                  | 112.1             | 0.79 | 0.48 |
| 165                      | CTC_1007          | B2    | A                  | 89.05             | 0.77 | 0.19 |
| 166                      | CV_7870           | B2    | A                  | 76.9              | 0.77 | 0.1  |
| 167                      | CTC_1007          | B2    | A                  | 82.55             | 0.79 | 0.32 |
| 168                      | CV_0618           | B2    | A                  | 92.19             | 0.8  | 0.28 |
| 169                      | CV_7870           | B3    | A                  | 76.48             | 0.78 | 0.33 |
| 170                      | CV_7870           | B3    | A                  | 87.58             | 0.78 | 0.38 |
| 171                      | CV_0618           | B3    | A                  | 88                | 0.77 | 0.35 |
| 172                      | RB_966928         | B3    | A                  | 80.67             | 0.79 | 0.34 |
| 173                      | CV_7870           | B3    | A                  | 86.53             | 0.79 | 0.44 |
| 174                      | RB_966928         | B3    | A                  | 97.43             | 0.8  | 0.46 |
| 175                      | CTC_1007          | B3    | A                  | 101.62            | 0.81 | 0.63 |

| Experimental plot number | Sugarcane Variety | Block | Experimental Field | Production (t/ha) | NDVI | VARI |
|--------------------------|-------------------|-------|--------------------|-------------------|------|------|
| 176                      | CTC_1007          | B3    | A                  | 91.14             | 0.81 | 0.5  |
| 177                      | RB_966928         | B3    | A                  | 75.43             | 0.79 | 0.31 |
| 178                      | CTC_1007          | B3    | A                  | 89.05             | 0.8  | 0.47 |
| 179                      | RB_966928         | B3    | A                  | 75.43             | 0.79 | 0.33 |
| 180                      | CV_7870           | B3    | A                  | 76.9              | 0.8  | 0.41 |
| 181                      | CTC_1007          | B3    | A                  | 89.05             | 0.8  | 0.45 |
| 182                      | CV_0618           | B3    | A                  | 80.46             | 0.8  | 0.41 |
| 183                      | RB_966928         | B3    | A                  | 72.91             | 0.8  | 0.42 |
| 184                      | CV_7870           | B3    | A                  | 85.49             | 0.8  | 0.49 |
| 185                      | CV_0618           | B3    | A                  | 84.65             | 0.8  | 0.48 |
| 186                      | CV_7870           | B3    | A                  | 72.29             | 0.8  | 0.39 |
| 187                      | CV_0618           | B3    | A                  | 91.14             | 0.8  | 0.49 |
| 188                      | CTC_1007          | B3    | A                  | 99.1              | 0.81 | 0.5  |
| 189                      | RB_966928         | B3    | A                  | 98.06             | 0.8  | 0.53 |
| 190                      | CV_0618           | B3    | A                  | 85.9              | 0.81 | 0.42 |
| 191                      | CV_0618           | B3    | A                  | 84.02             | 0.81 | 0.39 |
| 192                      | CTC_1007          | B3    | A                  | 101.2             | 0.81 | 0.42 |
| 193                      | CV_0618           | B3    | A                  | 88                | 0.8  | 0.35 |
| 194                      | RB_966928         | B3    | A                  | 88.21             | 0.81 | 0.41 |
| 195                      | CV_7870           | B3    | A                  | 76.48             | 0.81 | 0.41 |
| 196                      | CTC_1007          | B3    | A                  | 110               | 0.81 | 0.53 |
| 197                      | CV_0618           | B4    | A                  | 83.18             | 0.78 | 0.49 |
| 198                      | CTC_1007          | B4    | A                  | 112.1             | 0.79 | 0.51 |
| 199                      | RB_966928         | B4    | A                  | 88.21             | 0.79 | 0.39 |
| 200                      | CV_7870           | B4    | A                  | 68.72             | 0.79 | 0.38 |

| Experimental plot number | Sugarcane Variety | Block | Experimental Field | Production (t/ha) | NDVI | VARI |
|--------------------------|-------------------|-------|--------------------|-------------------|------|------|
| 201                      | CV_0618           | B4    | A                  | 84.02             | 0.8  | 0.47 |
| 202                      | CV_7870           | B4    | A                  | 79.83             | 0.79 | 0.45 |
| 203                      | CTC_1007          | B4    | A                  | 92.4              | 0.8  | 0.71 |
| 204                      | CTC_1007          | B4    | A                  | 83.6              | 0.79 | 0.46 |
| 205                      | RB_966928         | B4    | A                  | 103.71            | 0.79 | 0.41 |
| 206                      | CV_7870           | B4    | A                  | 77.1              | 0.79 | 0.4  |
| 207                      | RB_966928         | B4    | A                  | 87.58             | 0.79 | 0.45 |
| 208                      | CV_7870           | B4    | A                  | 68.1              | 0.79 | 0.39 |
| 209                      | RB_966928         | B4    | A                  | 76.69             | 0.79 | 0.5  |
| 210                      | RB_966928         | B4    | A                  | 92.19             | 0.81 | 0.69 |
| 211                      | RB_966928         | B4    | A                  | 83.39             | 0.79 | 0.4  |
| 212                      | CTC_1007          | B4    | A                  | 104.76            | 0.79 | 0.46 |
| 213                      | CV_0618           | B4    | A                  | 83.81             | 0.79 | 0.36 |
| 214                      | CV_0618           | B4    | A                  | 77.1              | 0.78 | 0.37 |
| 215                      | CV_0618           | B4    | A                  | 78.99             | 0.79 | 0.45 |
| 216                      | CV_7870           | B4    | A                  | 70.61             | 0.79 | 0.42 |
| 217                      | RB_966928         | B4    | A                  | 112.1             | 0.8  | 0.58 |
| 218                      | CV_0618           | B4    | A                  | 75.22             | 0.8  | 0.42 |
| 219                      | CTC_1007          | B4    | A                  | 92.82             | 0.8  | 0.32 |
| 220                      | CTC_1007          | B4    | A                  | 89.05             | 0.8  | 0.43 |
| 221                      | CV_7870           | B4    | A                  | 82.76             | 0.78 | 0.29 |
| 222                      | CV_7870           | B4    | A                  | 79.62             | 0.8  | 0.39 |
| 223                      | CTC_1007          | B4    | A                  | 82.76             | 0.79 | 0.43 |
| 224                      | CV_0618           | B4    | A                  | 98.48             | 0.8  | 0.56 |

Table S2 – Data of predicted and observed production, NDVI, and VARI of six commercial locations and their plots, cultivated with sugarcane (Locations A to F). This data was used during the validation of the sugarcane prediction model.

| Location | Farm name   | Farm | Plot | Predicted (t/ha) | Observed (t/ha) | NDVI | VARI | Coordinates (lat/long) |
|----------|-------------|------|------|------------------|-----------------|------|------|------------------------|
| 1        | Aurora      | A    | A-1  | 119.05           | 123.33          | 0.83 | 0.48 | -21.81 -47.35          |
| 2        | Aurora      | A    | A-2  | 128.54           | 123.30          | 0.85 | 0.49 | -21.81 -47.36          |
| 3        | Aurora      | A    | A-3  | 118.48           | 123.41          | 0.81 | 0.44 | -21.82 -47.36          |
| 4        | Aurora      | A    | A-4  | 129.86           | 130.78          | 0.78 | 0.37 | -21.82 -47.36          |
| 5        | Aurora      | A    | A-6  | 121.24           | 115.48          | 0.82 | 0.39 | -21.81 -47.36          |
| 6        | Aurora      | B    | B-7  | 128.06           | 115.48          | 0.81 | 0.35 | -21.80 -47.35          |
| 7        | Aurora      | B    | B-8  | 121.31           | 123.62          | 0.82 | 0.36 | -21.80 -47.35          |
| 8        | Aurora      | B    | B-9  | 115.88           | 111.28          | 0.83 | 0.48 | -21.80 -47.35          |
| 9        | Aurora      | B    | B-10 | 117.56           | 123.61          | 0.85 | 0.48 | -21.80 -47.35          |
| 10       | Aurora      | B    | B-12 | 109.35           | 115.48          | 0.84 | 0.44 | -21.80 -47.35          |
| 11       | Aurora      | C    | C-14 | 88.97            | 104.09          | 0.80 | 0.32 | -21.81 -47.35          |
| 12       | Aurora      | C    | C-15 | 63.86            | 63.42           | 0.85 | 0.49 | -21.82 -47.36          |
| 13       | Aurora      | C    | C-16 | 64.74            | 63.18           | 0.77 | 0.33 | -21.81 -47.35          |
| 14       | Aurora      | C    | C-17 | 66.99            | 63.07           | 0.81 | 0.42 | -21.81 -47.36          |
| 15       | Aurora      | C    | C-18 | 65.7             | 63.27           | 0.82 | 0.44 | -21.81 -47.36          |
| 16       | Boa Vista 6 | D    | D-4  | 85.1             | 97.90           | 0.82 | 0.40 | -21.59 -47.17          |
| 17       | Boa Vista 6 | D    | D-5  | 95.12            | 88.13           | 0.80 | 0.33 | -21.59 -47.17          |
| 18       | Boa Vista 6 | D    | D-6  | 81.2             | 73.42           | 0.84 | 0.42 | -21.59 -47.17          |
| 19       | Boa Vista 6 | D    | D-7  | 93.62            | 97.91           | 0.79 | 0.34 | -21.60 -47.17          |
| 20       | Boa Vista 6 | D    | D-8  | 95.87            | 93.01           | 0.78 | 0.31 | -21.60 -47.17          |

| Location | Farm name     | Farm | Plot | Predicted (t/ha) | Observed (t/ha) | NDVI | VARI | Coordinates (lat/long) |
|----------|---------------|------|------|------------------|-----------------|------|------|------------------------|
| 21       | Sao Vicente   | E    | E-1  | 92.2             | 82.54           | 0.82 | 0.39 | -21.58 -47.14          |
| 22       | Sao Vicente   | E    | E-2  | 87.64            | 92.00           | 0.82 | 0.39 | -21.59 -47.15          |
| 23       | Sao Vicente   | E    | E-3  | 88.29            | 91.64           | 0.84 | 0.47 | -21.58 -47.15          |
| 24       | Sao Vicente   | E    | E-4  | 82.61            | 82.33           | 0.81 | 0.40 | -21.58 -47.14          |
| 25       | Sao Vicente   | E    | E-5  | 90.2             | 91.64           | 0.81 | 0.47 | -21.58 -47.14          |
| 26       | Sao Vicente 1 | F    | F-1  | 78.9             | 74.44           | 0.85 | 0.11 | -21.58 -47.13          |
| 27       | Sao Vicente 1 | F    | F-2  | 82.07            | 85.92           | 0.86 | 0.12 | -21.58 -47.13          |
| 28       | Sao Vicente 1 | F    | F-3  | 83.03            | 84.72           | 0.84 | 0.13 | -21.58 -47.14          |
| 29       | Sao Vicente 1 | F    | F-4  | 78.91            | 77.83           | 0.81 | 0.11 | -21.58 -47.14          |
| 30       | Sao Vicente 1 | F    | F-5  | 82               | 82.38           | 0.83 | 0.11 | -21.58 -47.13          |
